# Supplementary material
Source: PubMed Central journal article supplement (PMC2667705)
Supplement: me.2007-0531_1.pdf [file me.2007-0531_1.pdf]

**Abbreviated Title: Down regulation of hepatic HNF4 $\alpha$  by insulin and SREBPs (Xie et al.)**

**Table S1. Primers and siRNA used in this study**

| <b>Primers for quantitative RT-PCR</b> |           |                 |                     |                           |                              |
|----------------------------------------|-----------|-----------------|---------------------|---------------------------|------------------------------|
| <b>MOUSE</b>                           | <b>NM</b> | <b>Position</b> | <b>Product (bp)</b> | <b>Forward (5' to 3')</b> | <b>Reverse (5' to 3')</b>    |
| <i>Hnf4a</i><br>(HNF4 $\alpha$ )       | NM_008261 | +658 to +1083   | 426                 | ATTGCCAACATCACAGACG       | GTAATCCTCCAGGCTCACTT         |
| <i>Pck1</i><br>(PEPCK)                 | NM_011044 | +155 to +423    | 269                 | GCATAACGGTCTGGACTTCT      | TGATGACTGTCTTGCTTTCG         |
| <i>G6pc</i><br>(G6Pase)                | NM_008061 | +1197 to +1451  | 255                 | ACTAAAGCCTCTGAAACCC       | AGATTCTGCACCGCAAG            |
| <i>Cyp7a1</i><br>(CYP7A1)              | NM_007824 | +84 to +309     | 226                 | GGGGATTGCTGTGGTAG         | CAGGGAGTTTGTGATGAAG          |
| <i>Pklr</i><br>(L-PK)                  | NM_013631 | +384 to +594    | 211                 | GCACGACTCAACTTCTCCC       | CCAGCACCTGTGAACCCT           |
| <i>Scd1</i><br>(SCD-1)                 | NM_009127 | +431 to +647    | 217                 | CCTGCCTCTTCGGGATT         | TTGTGAGGGTCGGCGTGT           |
| <i>Fasn</i><br>(FAS)                   | NM_007988 | +1249 to +1465  | 217                 | GGGTCTATGCCACGATT         | CACAGGGACCGAGTAATG           |
| <i>Ldlr</i><br>(LDLR)                  | NM_010700 | +1662 to +1812  | 151                 | CAGTCCCAGGCAGCGTAT        | TTGATCTTGGCGGGTGT            |
| <i>Hmgcr</i><br>(HMGCR)                | NM_008255 | +2569 to +2687  | 120                 | GGACCAACCTTCTACCTC        | CCATCACAGTGCCACATAC          |
| <i>Actb</i><br>( $\beta$ -Actin)       | NM_007393 | +809 to +948    | 140                 | GACGGCCAGGTCATCACTAT      | CGGATGTCAACGTCACACTT         |
| <i>Srebf1</i><br>(SREBP1)              | NM_011480 | +1770 to +2048  | 279                 | ACTTCTGGAGACATCGCAAAC     | GGTAGACAACAGCCGCATC          |
| <i>Srebf2</i><br>(SREBP2)              | NM_033218 | +157 to +287    | 131                 | GCGTTCTGGAGACCATGGA       | ACAAAGTTGCTCTGAAAACAAT<br>CA |
| <b>RAT</b>                             | <b>NM</b> | <b>Position</b> | <b>nt</b>           | <b>Forward (5' to 3')</b> | <b>Reverse (5' to 3')</b>    |
| <i>Hnf4a</i><br>(HNF4 $\alpha$ )       | NM_022180 | +149 to +278    | 130                 | GGTGCCAACCTCAACTC         | CGCTCCTCCTGAAGAAT            |
| <i>Pck1</i><br>(PEPCK)                 | NM_198780 | +620 to +853    | 234                 | GCTGACAGACTCGCCCTAT       | CCACCGTATCCGCTTCC            |
| <i>G6pc</i><br>(G6Pase)                | NM_013098 | +818 to +1067   | 250                 | TCCACCTTGACACTACACCC      | GGGACGGTCGCACTCTT            |

**Table S1. Primers used in this study (cont)**

|                                  |           |               |     |                      |                       |
|----------------------------------|-----------|---------------|-----|----------------------|-----------------------|
| <i>Cyp7a1</i><br>(CYP7A1)        | NM_012942 | +535 to +736  | 202 | TCACGGAAGGGATGTA     | GCTTTATGTGCGGTCT      |
| <i>Actb</i><br>( $\beta$ -Actin) | NM_031144 | +826 to +1015 | 190 | ACTATTGGCAACGAGCGGTT | TGTCAGCAATGCCTGGGTACA |

| <b>Primers for ChIP</b>          |  |                 |            |                           |                           |
|----------------------------------|--|-----------------|------------|---------------------------|---------------------------|
| <b>HUMAN</b>                     |  | <b>Position</b> | <b>Set</b> | <b>Forward (5' to 3')</b> | <b>Reverse (5' to 3')</b> |
| <i>LDLR</i><br>(LDLR)            |  | -285 to -22     |            | CATCGAGAAATTTTCAGGAGGA    | AATGTGAGGTTTCTAGCAGGG     |
| <i>HNF4A</i><br>(HNF4 $\alpha$ ) |  | -116 to +97     | 1          | TAACCATTAACCCCCACCCCT     | AGTCGCATTCTCCCTGCCT       |
| <i>HNF4A</i>                     |  | -283 to -8      | 2          | AAATGAGTGCCCGTGAGTCAT     | TCTCTGCCTTCCTTTCAAACC     |
| <i>HNF4A</i>                     |  | -432 to -162    | 3          | TCTGCAAAAGCATTGAGGGT      | TGGCTGTTTGTGGTTTCTG       |
| <i>HNF4A</i>                     |  | -999 to -658    | 4          | TAGGAGACGGGTGGAGAGAAA     | AGTGTTTCTGGCCAGGCT        |

| <b>Primers for construction of hHNF4-luc</b> |  |                 |  |                                    |                                 |
|----------------------------------------------|--|-----------------|--|------------------------------------|---------------------------------|
| <b>HUMAN</b>                                 |  | <b>Position</b> |  | <b>Forward (5' to 3')</b>          | <b>Reverse (5' to 3')</b>       |
| <i>HNFA</i><br>(HNF4 $\alpha$ )              |  | -624 to +89*    |  | <u>GCACTCGAGATCACAGGGAGCAGGAGC</u> | <u>GAGAAGCTTTCTCCCTGCCTCCAC</u> |

\*Underlined sequence added for cloning purposes

| <b>dsRNA for siRNA</b>          |                         |                 |  |                           |                           |
|---------------------------------|-------------------------|-----------------|--|---------------------------|---------------------------|
| <b>HUMAN</b>                    | <b>NM</b>               | <b>Position</b> |  | <b>Forward (5' to 3')</b> | <b>Reverse (5' to 3')</b> |
| <i>HNFA</i><br>(HNF4 $\alpha$ ) | NM_000457               | +179 to +197    |  | UGUGCAGGUGUUGACGAUGdTdT   | CAUCGUCAACACCUGCACAdTdT   |
| <i>SCAP</i><br>(SCAP)           | NM_012235               | +579 to +597    |  | CCUCCUGGCAGUAGAUGUAdTdT   | UACAUCUACUGCCAGGAGGdTdT   |
| <b>Firefly</b>                  | <b>negative control</b> |                 |  | <b>Forward (5' to 3')</b> | <b>Reverse (5' to 3')</b> |
| <i>Luc</i><br>(Luciferase)      | "siGL3"                 |                 |  | CUUACGCUGAGUACUUCGAdTdT   | GAAUGCGACUCAUGAAGCUdTdT   |

| <b>Primers for RT-PCR (to verify siRNA)</b> |           |                 |                           |                           |
|---------------------------------------------|-----------|-----------------|---------------------------|---------------------------|
| <b>HUMAN</b>                                | <b>NM</b> | <b>Position</b> | <b>Forward (5' to 3')</b> | <b>Reverse (5' to 3')</b> |
| <i>SCAP</i><br>(SCAP)                       | NM_012235 | +1111 to +1544  | ATCCCCCTTGTGACCACCTA      | AAGAAGTCAGACACCAGCCC      |
| <i>ACTB</i><br>( $\beta$ -Actin)            | NM_001101 | +523 to +974    | CGTACCACTGGCATCGTGAT      | GTGTTGGCGTACAGGTCTTTG     |
