# Supplementary material
Source: PubMed Central journal article supplement (PMC2667705)
Supplement: me.2007-0531_2.pdf [file me.2007-0531_2.pdf]

**Abbreviated Title: Down regulation of hepatic HNF4 $\alpha$  by insulin and SREBPs (Xie et al.)**

**Table S2. Sequence of oligonucleotides used to study putative Sterol Response Elements (SRE) in the human *HNF4A* P1 promoter**

|                |                                                      |
|----------------|------------------------------------------------------|
| Consensus SRE* | 5' -gatcGATCATC <u>ACCCCACT</u> GCA-3'               |
| Mutant SRE     | 5' -gatcTGATAAGATATGCA-3'                            |
| SRE1†          | 5' -gatcACTCC <u>CAGCAGATCTTCC</u> CAGAGGAC-3'       |
| SRE2           | 5' -gatcAGAGCCTCC <u>ACCCCTT</u> CACAGA-3'           |
| SRE3           | 5' -gatcATTA <u>ACCCCA</u> CCCTCCCCGGCA-3'           |
| SRE4           | 5' -gatcTGCAG <u>CCCGCC</u> CAGCCTATCCA-3'           |
| SRE5           | 5' -gatcTAATTAGC <u>ACCCGG</u> TGTCA-3'              |
| SRE6           | 5' -gatcTGCTGACTTGGGGTGACAATGGCTT-3'                 |
| <b>SRE1</b>    | <b>ATCTTCCAG</b>                                     |
| mutSRE1a‡      | 5' -gACTCC <u>CAGCAGAG</u> <b>GT</b> TTCAGAGGACGG-3' |
| mutSRE1b       | 5' -CCCAGCAGATCTT <b>AA</b> CAGAGGACGGTTG-3'         |
| mutSRE1c       | 5' -CCCAGCAGATCTTCC <b>AT</b> GAGGACGGTTGAAAG-3'     |
| <b>SRE6</b>    | <b>TTGGGGTGAC</b>                                    |
| mutSRE6a       | 5' -GCCTGACTTGGGGT <b>AC</b> CAATGGCTTGGAGGG-3'      |
| mutSRE6b       | 5' -GTTAGAATGCCTGACT <b>CT</b> GGGGTGACAATGGCTTG-3'  |

\* SRE consensus is underlined.

† Lowercase, sequence added to promoter sequence (uppercase). See Fig. 6 for nucleotide numbering relative to the transcription start site (+1) of the underlined portion (putative SRE).

‡ Mutant nucleotides are in bold and underlined.
