# Supplementary material
Source: PubMed Central journal article supplement (PMC2667705)
Supplement: me.2007-0531_3.pdf [file me.2007-0531_3.pdf]

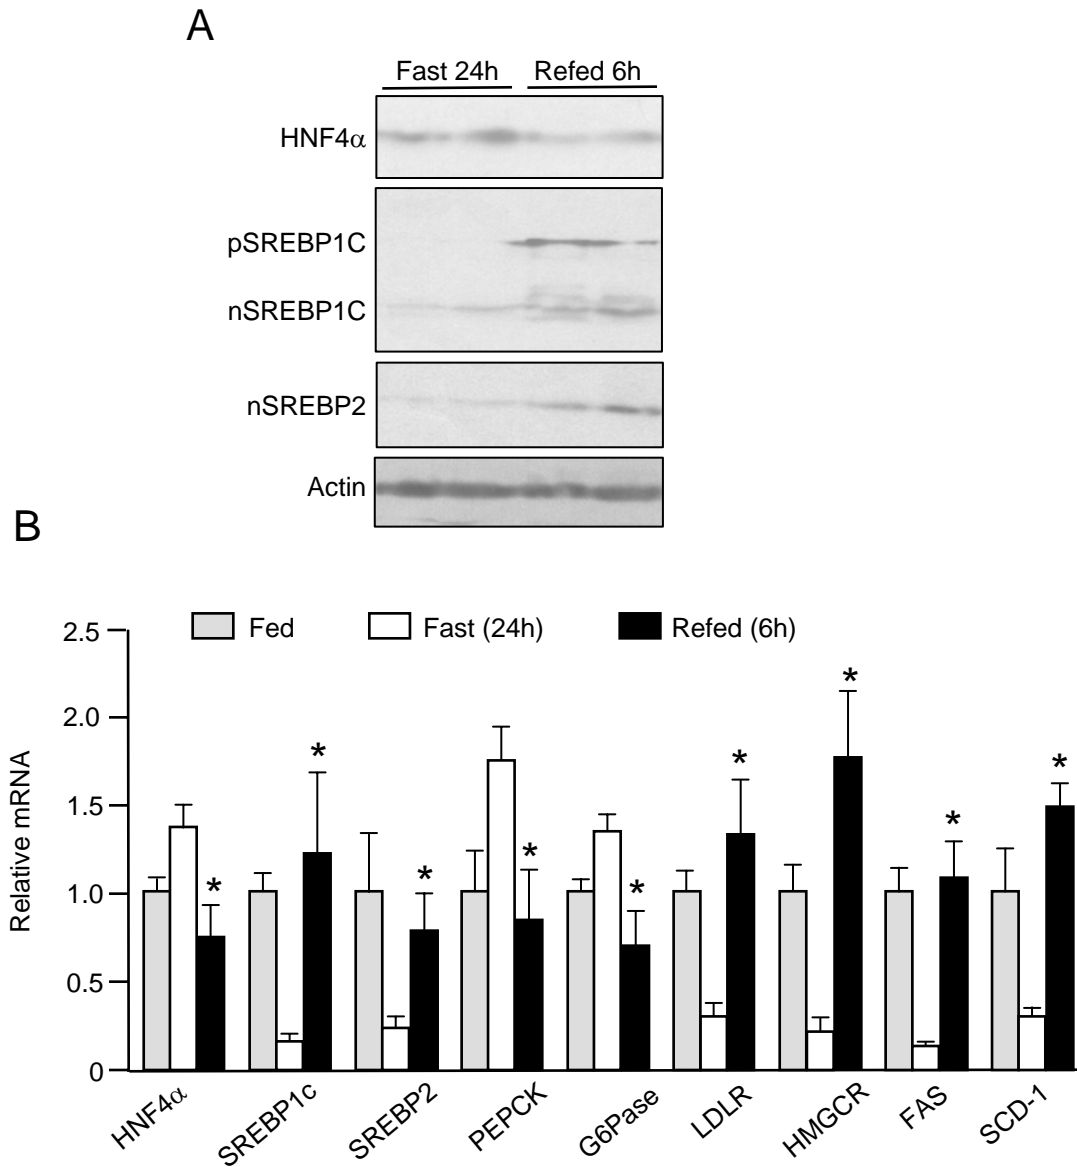

**Fig. S1. Inverse relationship between HNF4α gene expression and SREBPs in the livers of fasted and refed (6 hr) mice.**

(A) IB analysis of whole cell extracts (80 μg per lane) from the livers of 8-week old male C57BL/6J mice fed a normal chow, fasted for 24 hr or refed for 6 hr after a 24-hr fast. probed with anti-HNF4α, SREBP2, SREBP1 and β-actin antibodies as indicated. Six mice per group were analyzed; representative results from three mice are shown. (B) Quantitative RT-PCR detecting HNF4α and SREBPs and their target gene mRNA levels in the livers of C57BL/6J mice treated as in (A). Plotted are means ± SD normalized to β-actin. Statistically significant differences (\*, p<0.05) relative to the fasted samples are indicated for the 6-hr refed samples. See main text for details on methods and Supplemental Table S1 for information on primers. The results show that just as in the 12-hr refeeding experiment shown in Fig. 3 in the main text, 6 hr of refeeding also reduces the level of HNF4α mRNA and protein but increases SREBP levels relative to the fasted state.
