# Supplementary material
Source: PubMed Central journal article supplement (PMC2667705)
Supplement: me.2007-0531_4.pdf [file me.2007-0531_4.pdf]

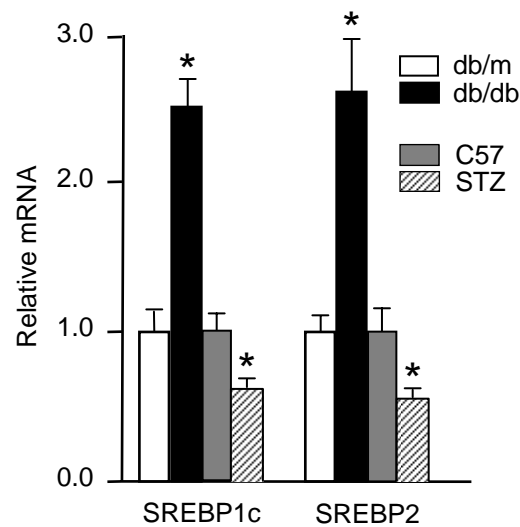

**Fig. S2. Relative mRNA levels of SREBPs in liver of diabetic mice.**

Quantitative RT-PCR detecting SREBP1c and SREBP2 mRNA levels in the livers of db/m, db/db, C57/BL6 control (C57) and STZ-treated mice. Plotted are the means  $\pm$  SD of 8 mice per group normalized to  $\beta$ -actin with the control mice (db/m and C57) arbitrarily set to 1.0. Statistically significant differences relative to controls are indicated (\*,  $p < 0.05$ ). See main text for details on methods and Supplemental Table S1 for information on primers. The results show that the SREBP1c and SREBP2 mRNA levels correspond with the protein levels shown in Fig. 4A in the main text -- an increase in expression in db/db mice and a decrease in expression in STZ-treated mice.
