# Supplementary material
Source: PubMed Central journal article supplement (PMC2667705)
Supplement: me.2007-0531_5.pdf [file me.2007-0531_5.pdf]

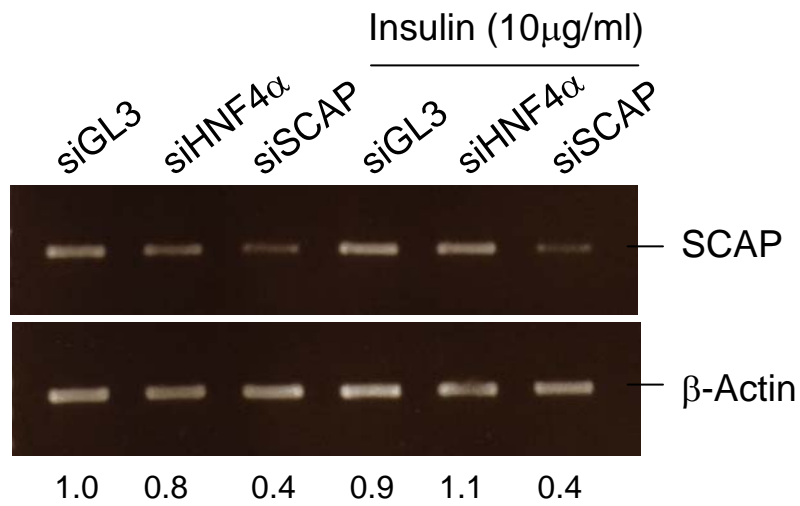

**Fig. S3. Knockdown of SCAP mRNA by RNAi in HepG2 cells.**

RT-PCR of mRNA isolated from HepG2 cells used in the SCAP siRNA experiment of Fig. 5 in the main text. siGL3, negative control siRNA, siHNF4α, positive control siRNA. Shown is the ethidium bromide-stained agarose gel of the PCR products with the relative amount of the SCAP signal normalized to the actin signal indicated. The results show that SCAP mRNA levels were successfully reduced by siRNA directed against SCAP. See Supplemental Table S1 for information on primers.
